# Supplementary material for: The Relationship Between Thermophysiology, Endocrinology and Behaviour in Female Giant Pandas
Source: Research Square preprint supplement (doi:10.21203/rs.3.rs-6423757/v1), 2025-05-04
Supplement: Supplementary file 1 [file 4d1ea82c6d7c9d27b8e944c0.docx]

**Supplementary**

The non-estrous eye temperature of 12 adult female giant pandas was collected in November-December 2023, while the temperature and humidity in the cage were also recorded. During the sampling process, the average environmental temperature was 12.43±4.19℃and the average environmental humidity was 63.66±13.26%. The spearman correlation was used to determine whether the environmental temperature and humidity affected the eye temperature. The eye temperature of female giant panda and the environmental temperature and humidity were not significantly correlate (*p*>0.05). Therefore, we did not consider the influence of environmental temperature and humidity on eye temperature.

| 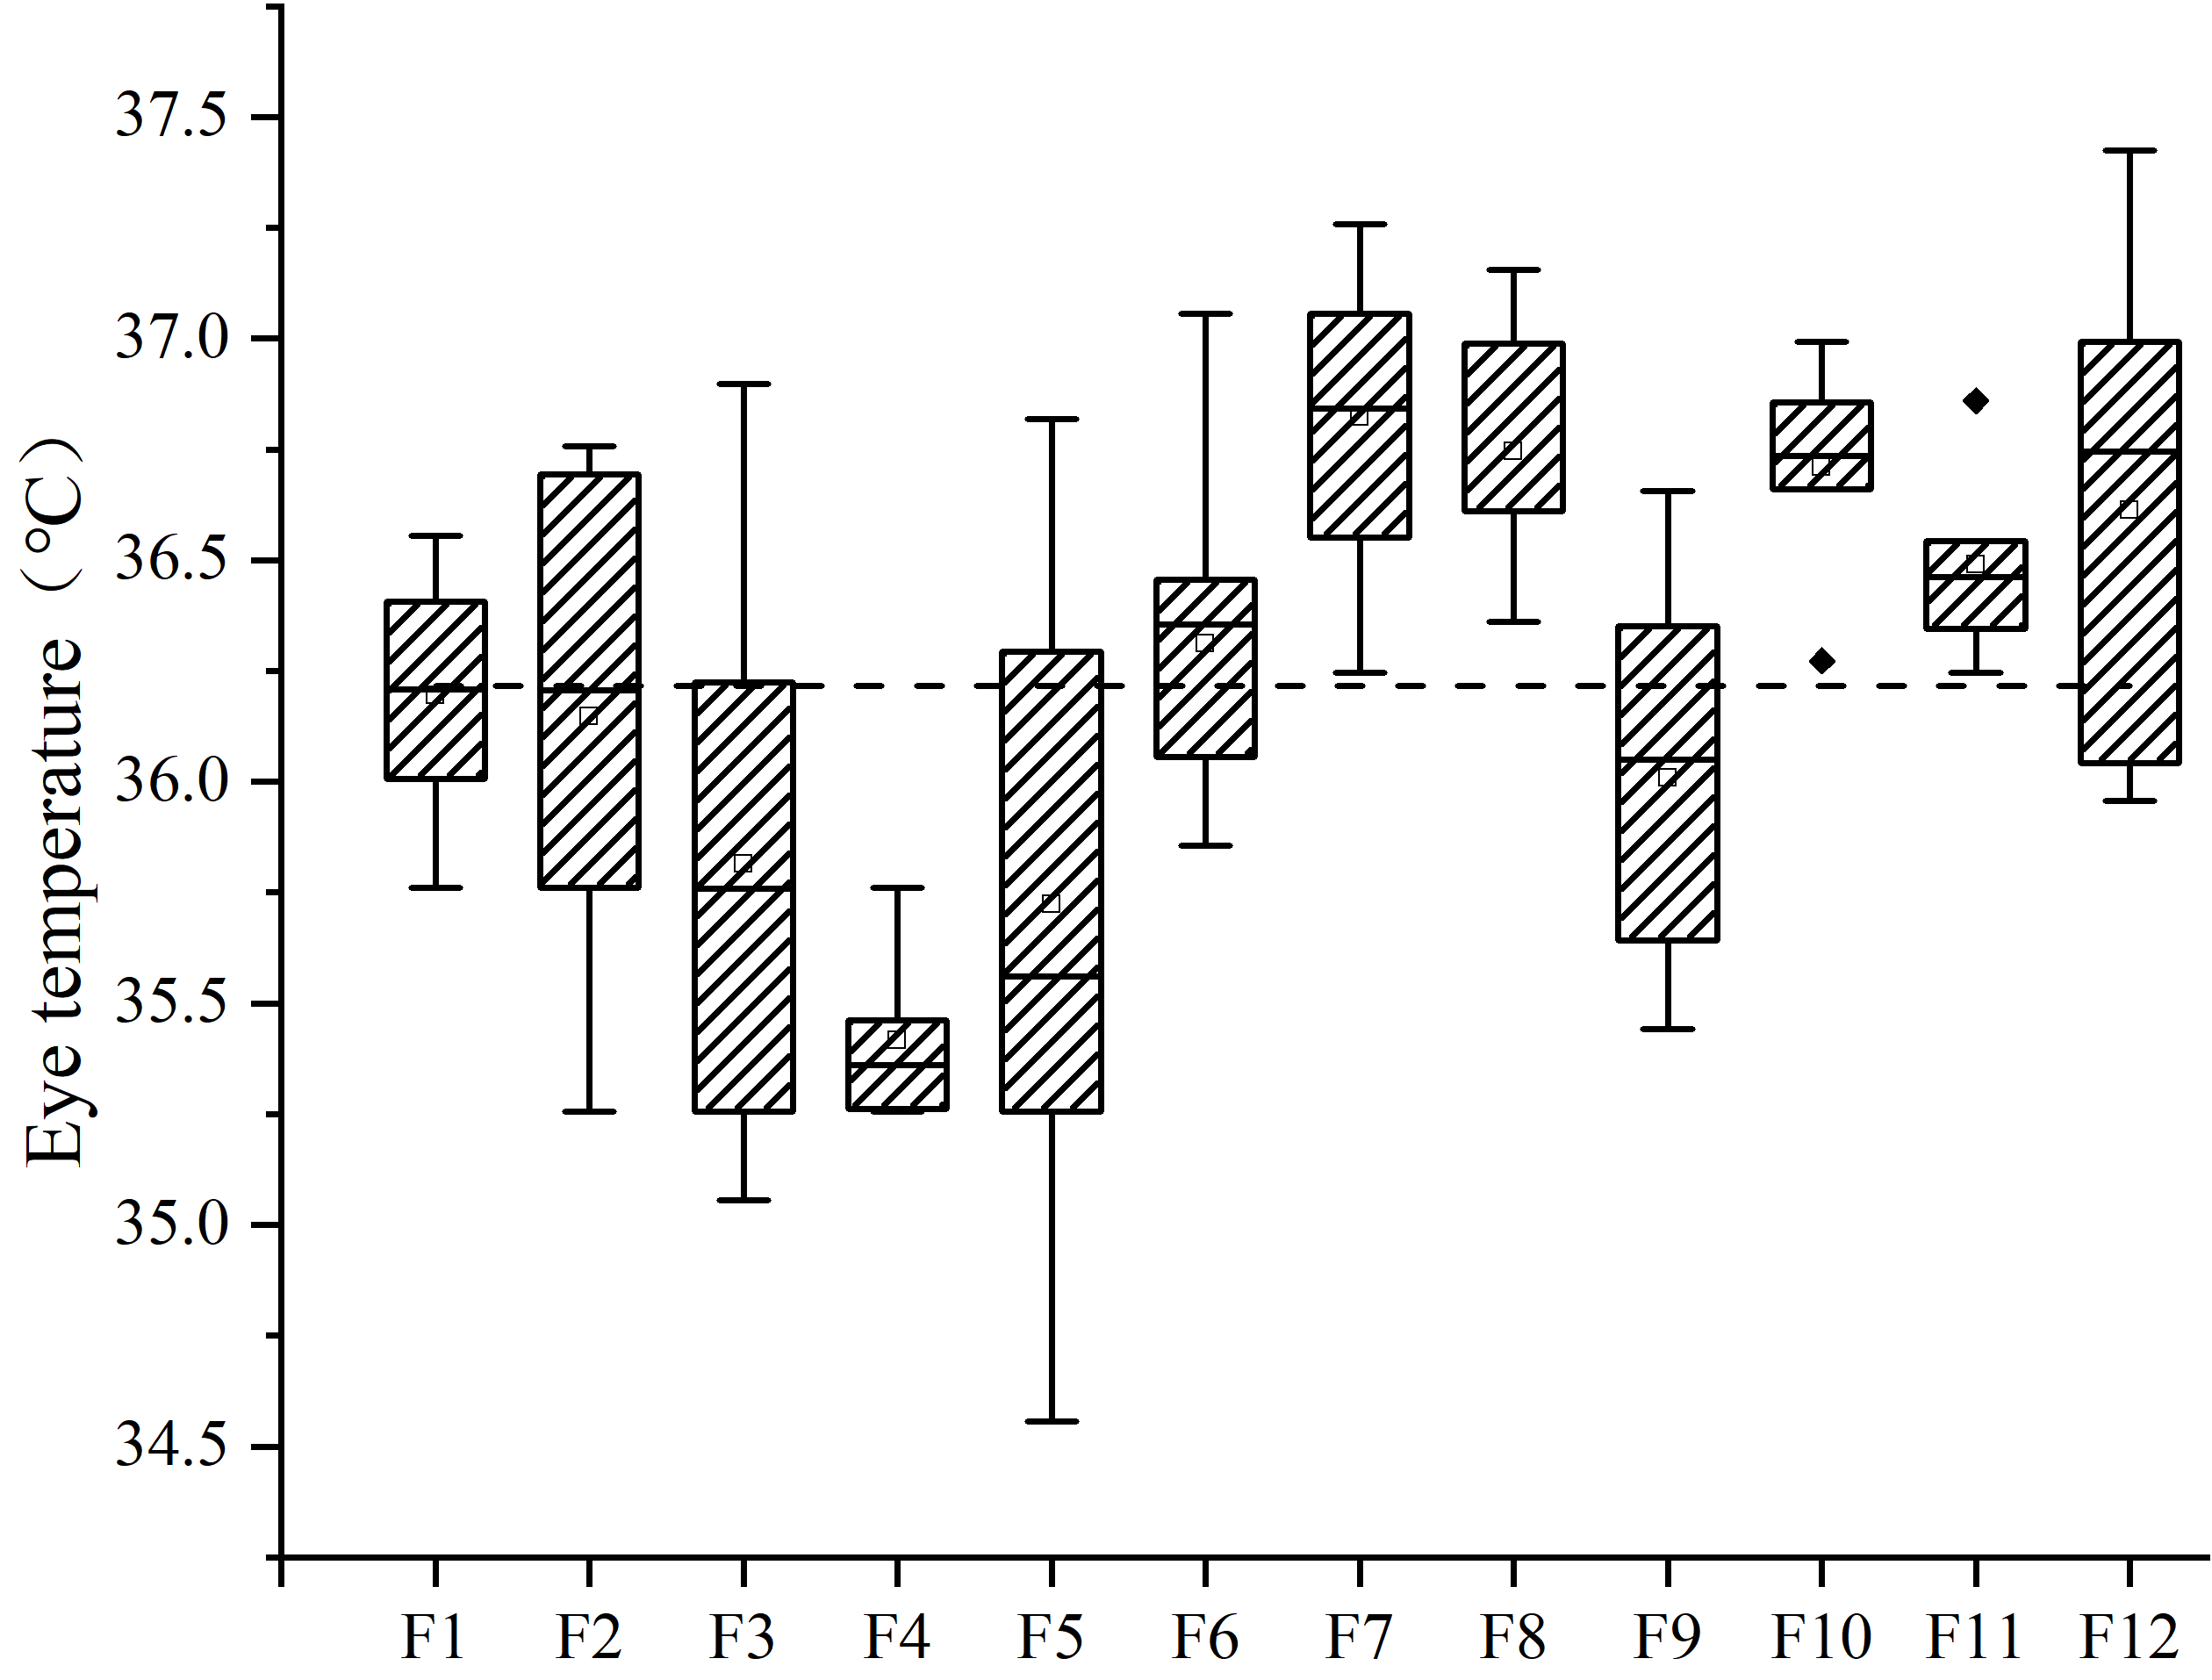 |
| --- |
| Appendix1 Eye temperature box plot of 12 individuals in non-estrus period |

| Appendix 2 Correlation analysis between eye temperature and environmental temperature and humidity in 12 individuals during non-oestrus period | | | | |
| --- | --- | --- | --- | --- |
| panda | temperature | | humidity | |
| r | *p* | r | *p* |
| F1 | 0.262 | 0.531 | -0.084 | 0.844 |
| F2 | -0.039 | 0.905 | -0.181 | 0.574 |
| F3 | -0.333 | 0.420 | -0.277 | 0.506 |
| F4 | -0.067 | 0.951 | 0.165 | 0.671 |
| F5 | -0.042 | 0.915 | 0.241 | 0.531 |
| F6 | -0.143 | 0.714 | 0.479 | 0.192 |
| F7 | 0.413 | 0.183 | -0.119 | 0.713 |
| F8 | -0.527 | 0.117 | 0.460 | 0.181 |
| F9 | -0.301 | 0.431 | -0.168 | 0.666 |
| F10 | -0.095 | 0.823 | 0.214 | 0.610 |
| F11 | 0.578 | 0.080 | -0.018 | 0.960 |
| F12 | 0.535 | 0.111 | -0.326 | 0.358 |

Note: r: correlation coefficient; *p*<0.05 significantly correlated
